# Supplementary material
Source: publisher figshare collection journal article supplement (https://gsapubs.figshare.com/ndownloader/files/26629217)
Supplement: Supplementary file 1 [file 26629217]

Table S3. Euler rotation parameters for the reconstructions

|  | Euler pole | | Angle of  Rotation (°) | References |
| --- | --- | --- | --- | --- |
| (°N) | (°E) |
| **For Fig. 4A and 4B** | | | | |
| North China Craton (NCC) to Laurentia | 58 | 30 | 68 | This study |
| Baltica to Laurentia | 81 | 250 | −50 | Cawood et al. (2010) |
| Siberia-Aldan to Siberia-Anabar | 60 | 115 | 25 | Evans (2009) |
| Siberia-Anabar to Laurentia | 77 | 98 | 137 | Evans et al. (2016a) |
| Greenland to North America | 68 | 242 | −14 | Roest and Srivastava (1989) |
| **For Fig. 4C and 4D** | | | | |
| North China Craton (NCC) to Laurentia | 58 | 30 | 68 | This study |
| Siberia-Aldan to Siberia-Anabar | 60 | 115 | 25 | Evans (2009) |
| Siberia-Anabar to Laurentia | 77 | 98 | 137 | Evans et al. (2016a) |
| Greenland to North America | 68 | 242 | −14 | Roest and Srivastava (1989) |
| Tarim to Laurentia | 74 | 340 | 124 | This study |
| Yili to Tarim | 0 | 0 | 0 | This study |
| South+West Australian to North Australian Craton | −20 | 135 | 40 | Li and Evans (2011) |
| Mawson Craton (Antarctica) to present Australia | −2 | 39 | 32 | Powell and Li (1994) |
| North Australia Craton to Laurentia | 64 | 113 | 108 | This Study |
| Amazonia to Laurentia | −12 | 133 | 111 | Li et al. (2008) |
| West Africa to Amazonia | 43 | 330 | −72 | Bispo-Santos et al. (2014) |
| Kalahari to Laurentia | 11 | 333 | 201 | Modified after Li et al. (2008) |
| Plata to Laurentia | 0 | 120 | 149 | Merdith et al. (2017) |
| São Francisco to Congo | 47 | 329 | 56 | McElhinny et al. (2003). |
| Laurentia to Baltica (930 Ma) | 81 | 250 | 50 | Cawood et al. (2010) |
| Baltica absolute rotation (930 Ma) | 28 | 296 | −110 | This study |
| Congo absolute rotation (930 Ma) | −53 | 341 | −195 | This study |
| Baltica to Laurentia (780 Ma) | 81 | 250 | −50 | Cawood et al. (2010) |
| Laurentia absolute rotation (780 Ma) | −24 | 246 | −96 | This study |
| South China Block to India (780 Ma) | 11 | 78 | 41 | Merdith et al. (2017) |
| India absolute rotation (780 Ma) | 80 | 71 | −182 | This study |

Ding, J., et al., 2021, North China craton: The conjugate margin for northwestern Laurentia in Rodinia: Geology, v. 49, https://doi.org/10.1130/G48483.1
